# Supplementary material
Source: Research Square preprint supplement (doi:10.21203/rs.3.rs-9360097/v1)
Supplement: Supplementary file 1 [file db0b7d2b662ed4a7f276d96e.docx]

**Supplementary Tables**

**Supplementary Table S1. Approximate contingency tables corresponding to agreement and classification analysis between metabolic syndrome definitions (N = 200)**

**A. NCEP-ATP III vs JIS**

| **NCEP-ATP III** | **JIS MetS (+)** | **JIS MetS (−)** | **Total** |
| --- | --- | --- | --- |
| MetS (+) | 45 | 5 | 50 |
| MetS (−) | 3 | 147 | 150 |
| **Total** | **48** | **152** | **200** |

**B. WHO vs NCEP-ATP III**

| **WHO** | **NCEP-ATP III MetS (+)** | **NCEP-ATP III MetS (−)** | **Total** |
| --- | --- | --- | --- |
| MetS (+) | 44 | 2 | 46 |
| MetS (−) | 6 | 148 | 154 |
| **Total** | **50** | **150** | **200** |

**C. WHO vs JIS**

| **WHO** | **JIS MetS (+)** | **JIS MetS (−)** | **Total** |
| --- | --- | --- | --- |
| MetS (+) | 36 | 9 | 45 |
| MetS (−) | 12 | 143 | 155 |
| **Total** | **48** | **152** | **200** |

**Note:** These contingency tables correspond to the pairwise comparisons presented in Table 5 of the main manuscript. Because sensitivity, specificity, positive predictive value (PPV), and negative predictive value (NPV) were reported as rounded percentages, the cell counts shown represent the closest integer approximations consistent with those values.

**Supplementary Table S2**

**Sensitivity analysis excluding participants with previously diagnosed diabetes (N = 180): agreement and comparative classification characteristics between metabolic syndrome definitions**

| **Comparison** | **N** | **κ (95% CI)** | **McNemar’s p-value** | **Sensitivity (%)** | **Specificity (%)** | **PPV (%)** | **NPV (%)** |
| --- | --- | --- | --- | --- | --- | --- | --- |
| NCEP-ATP III vs JIS | 180 | 0.86 (0.77–0.94) | 0.006 | 94.4 | 97.1 | 94.4 | 97.1 |
| WHO vs NCEP-ATP III | 180 | 0.65 (0.52–0.78) | 0.002 | 60.0 | 97.5 | 88.2 | 88.0 |
| WHO vs JIS | 180 | 0.61 (0.48–0.74) | <0.001 | 57.8 | 97.0 | 87.5 | 87.4 |

**Note:** Participants with previously diagnosed diabetes (n = 20) were excluded to assess whether pre-existing diabetes influenced agreement and classification performance between metabolic syndrome definitions.
